# Supplementary material for: Disruption of O-Linked N-Acetylglucosamine Signaling in Placenta Induces Insulin Sensitivity in Female Offspring
Source: MDPI journal article supplement (doi:10.3390/ijms22136918), 2021-06-28
Supplement: s1 [file s1]

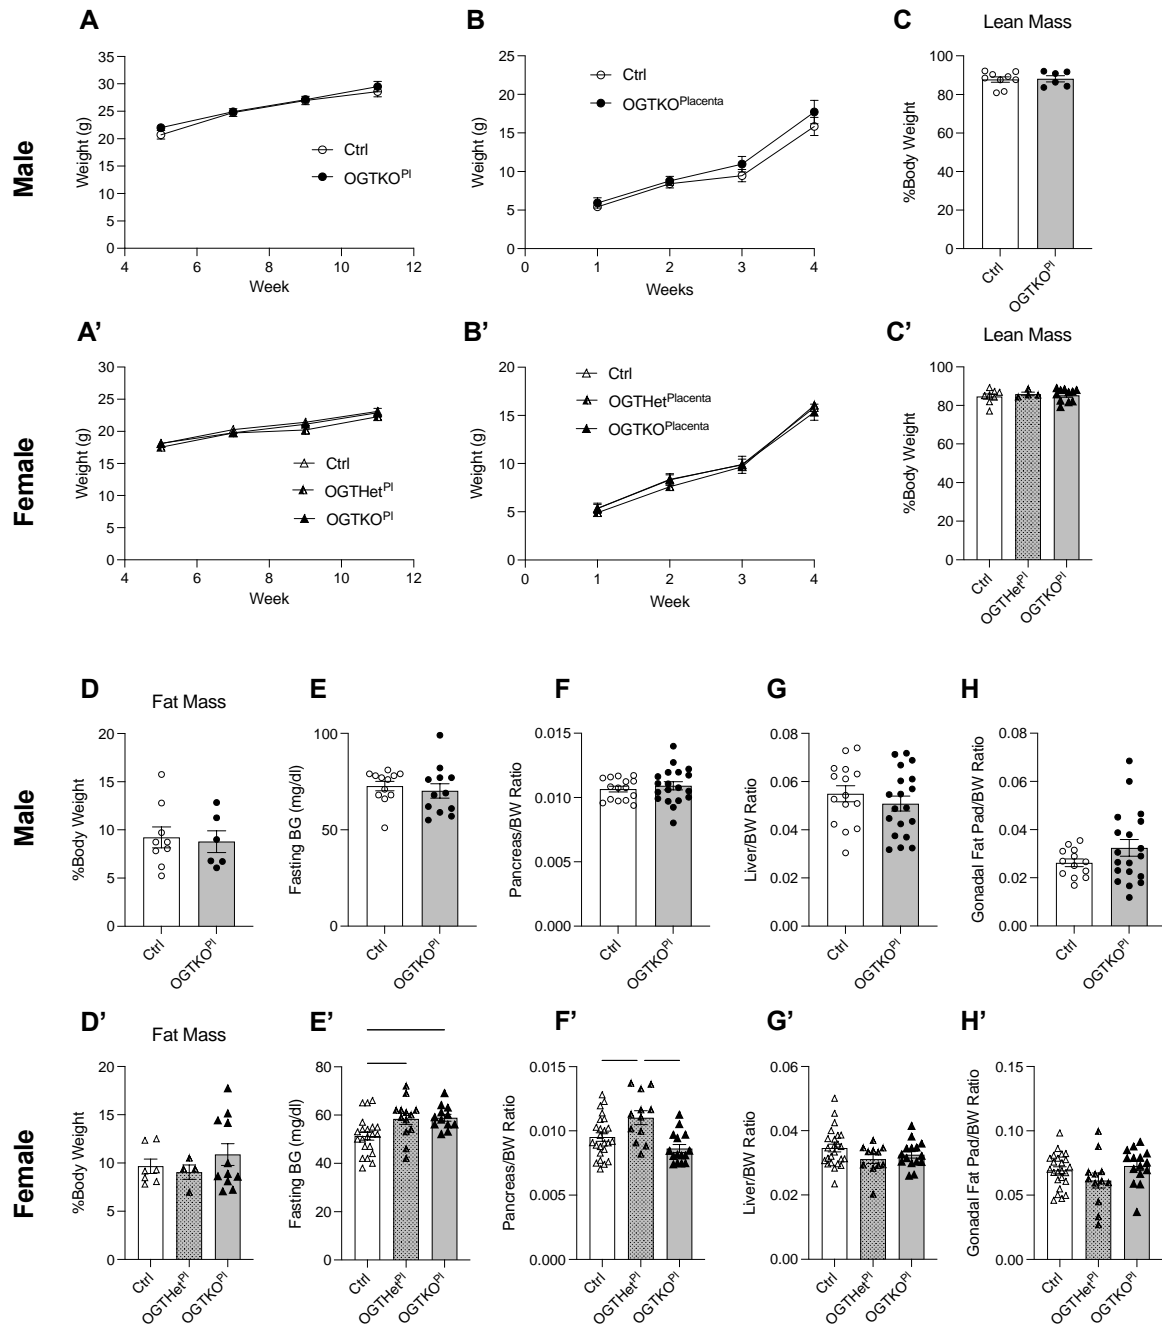

Supplementary Figure S1. (A) Body weight of males and (A') females over 12 weeks on NC (n=12). (B) Body weight of males (n=6) and (B') females (n=4, 8) over week of life 1-4. (C) Lean mass of males (n=6, 9) and (C') females (n=4, 11) after 12 weeks NC as assessed by EchoMRI. (D) Fat mass of males (n=6, 9) and (D') females (n=4, 11) after 12 weeks NC as assessed by EchoMRI. (E) Fasting blood glucose in males (n=12) and (E') females (n=12, 21) at 6 weeks NC. (F) Pancreas weight normalized to body weight (BW) post 12 weeks of HFD for males (n=15, 19) and (F') females (n=12, 24). (G) Liver weight normalized to body weight (BW) post 12 weeks of HFD for males (n=15, 19) and (G') females (n=11, 24). (H) Gonadal fat pad weight normalized to body weight (BW) post 12 weeks of HFD for males (n=13, 19) and (H') females (n=12, 24). (A and B) were presented as mean  $\pm$  SEM, two-way ANOVA. (C-H) were presented as mean  $\pm$  SEM, unpaired t-test for males and one-way ANOVA for females. p values, \*p < 0.05, \*\*\*p < 0.001.

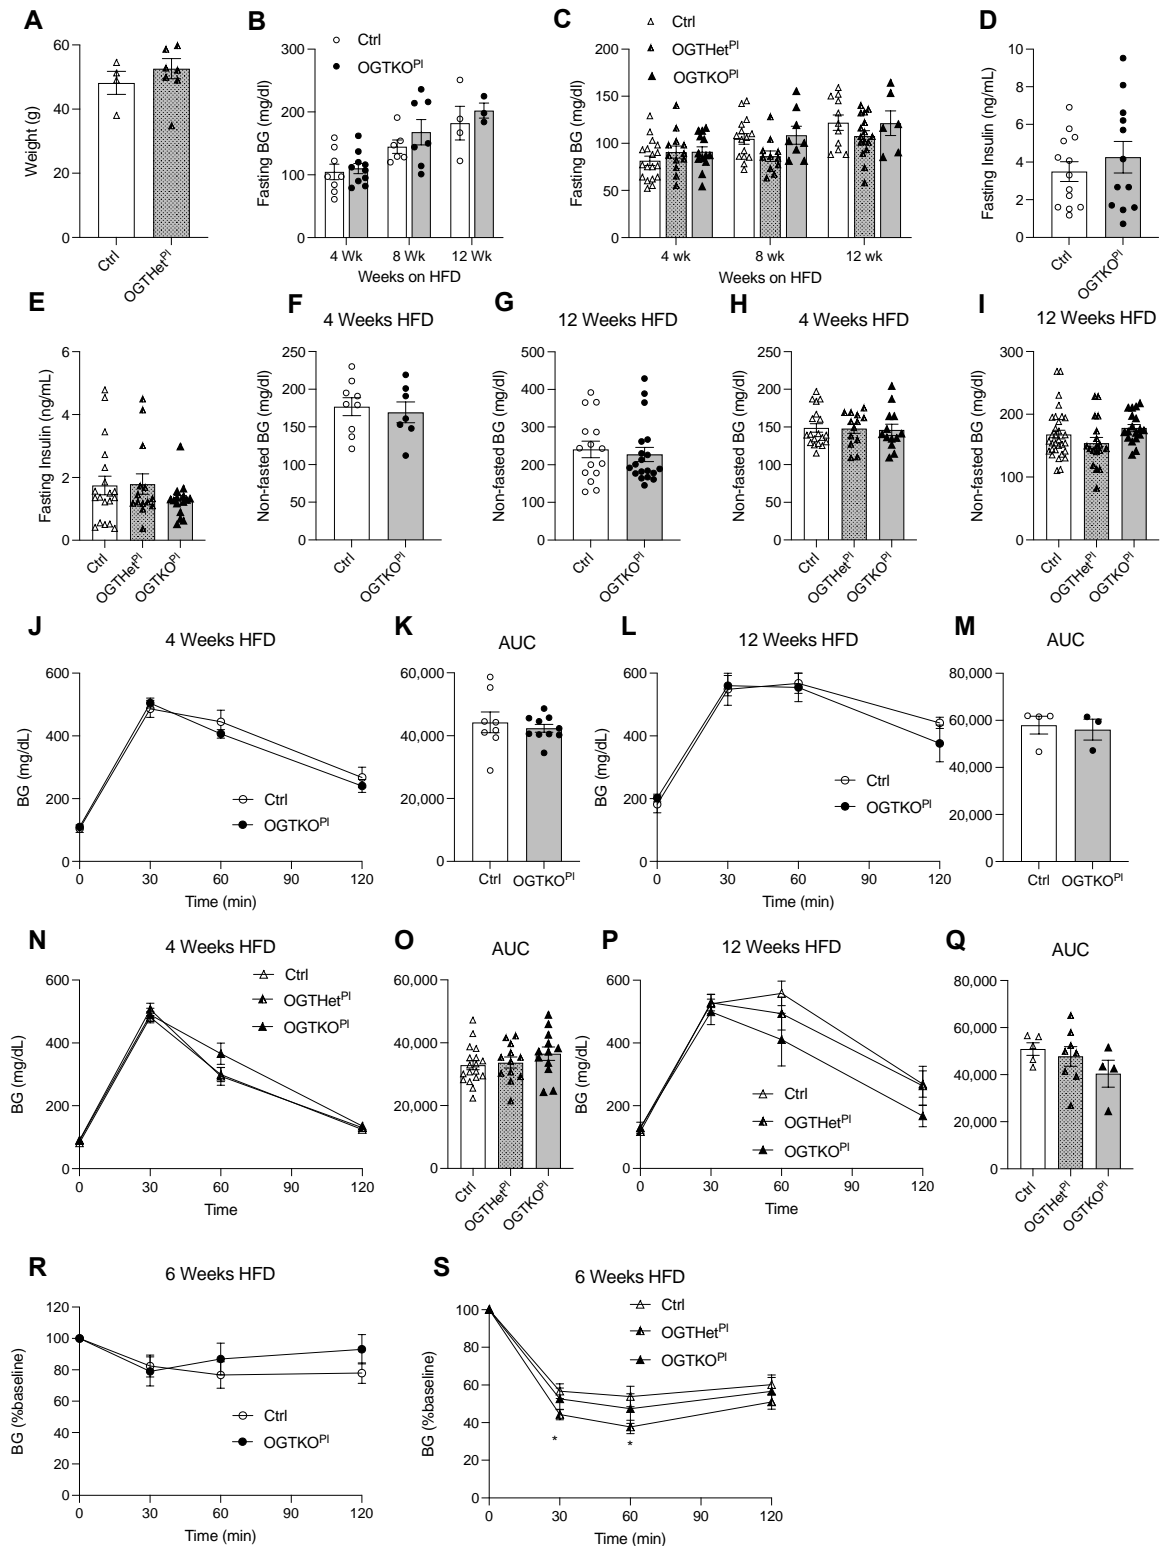

Supplementary Figure S2. (A) Body weight of cohort of females on 16 weeks of HFD that underwent indirect calorimetry testing (n=4, 8). (B) Fasting blood glucose was obtained at 4, 8 and 12 weeks of HFD for males (n=3, 10) and (C) females (n=6, 18). (D) Fasting insulin levels at 12 weeks of HFD for males (n=12, 13) and (E) females (n=14, 19). (F) Non-fasted blood glucose for males was obtained at 4 (n=7, 9) and (G) 12 weeks (n=15, 19) of HFD. (H) Non-fasted blood glucose for females was obtained at 4 (n=13, 19) and (I) 12 weeks (n=18, 31) of HFD. (J) IPGTT and (K) calculated AUC at 4 weeks of

HFD for males (n=8, 10). (L) IPGTT and (M) calculated AUC at 12 weeks of HFD for males (n=3, 4). (N) IPGTT and (O) calculated AUC at 4 weeks of HFD for females (n=12, 18). (P) IPGTT and (Q) calculated AUC at 12 weeks of HFD for females (n=4, 8). (R) ITT at 6 weeks on HFD for male (n=7, 8) and (S) females (n=9, 19). Blood glucose values post insulin injection are expressed as a percent of baseline blood glucose. (A, B, D, F, G, K and M) were presented as mean  $\pm$  SEM, unpaired t-test. (C, E, H, I, O, and Q) were presented as mean  $\pm$  SEM, one-way ANOVA. (J, L, N, P, R and S) were presented as mean  $\pm$  SEM, two-way ANOVA. p values, \*p < 0.05.

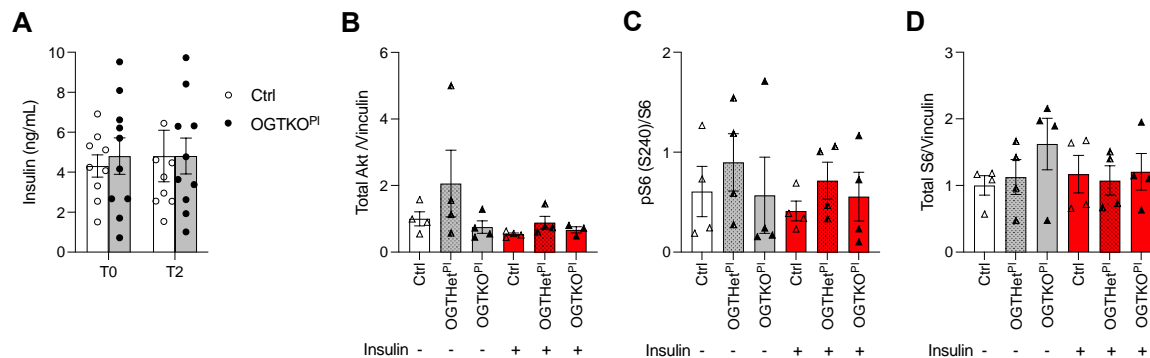

Supplementary Figure S3. (A) In vivo glucose stimulated insulin secretion (GSIS) for males (n=9, 10). T0 is a fasted state. T2 is two minutes post insulin injection. (B) Quantification of western blot for total Akt/Vinculin, (C) pS6(S240)/S6, and (D) total S6/Vinculin from liver samples visualized in (Figure. 5G). (A) was presented as mean  $\pm$  SEM, two-way ANOVA. (B-D) were presented as mean  $\pm$  SEM, one-way ANOVA.
